# Supplementary material
Source: Springer Nature journal article supplement (https://www.springermedizin.de/resource/supplementary/12936_2009_1155_MOESM3_ESM.pdf/9549988)

Group I - CVMNK at day 0

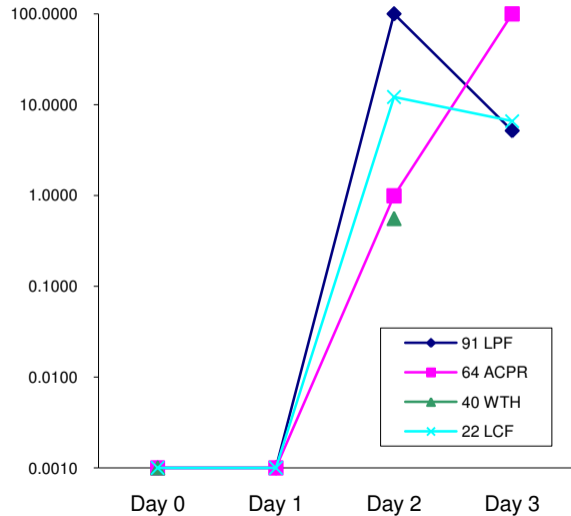

Group II - CVMNK / CVIET at day 0.

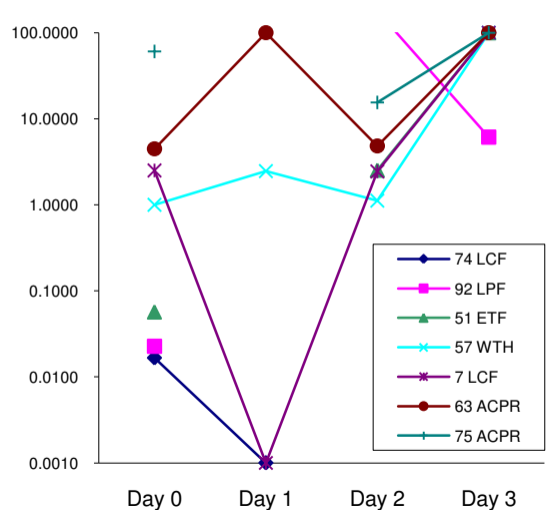

Group III - CVIET at day 0

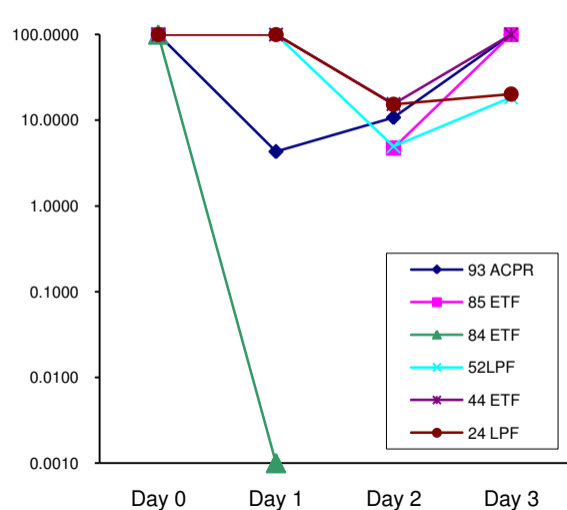

Supplement: MOESM3 [file 9549988]
